# Supplementary material for: Msx1 and Msx2 function together in the regulation of primordial germ cell migration in the mouse
Source: PubMed Central journal article supplement — Dev Biol. Author manuscript; Available in PMC 2017 Apr 27. (PMC5407493; doi:10.1016/j.ydbio.2016.07.013), 2016-07-18

Supplementary Figure1

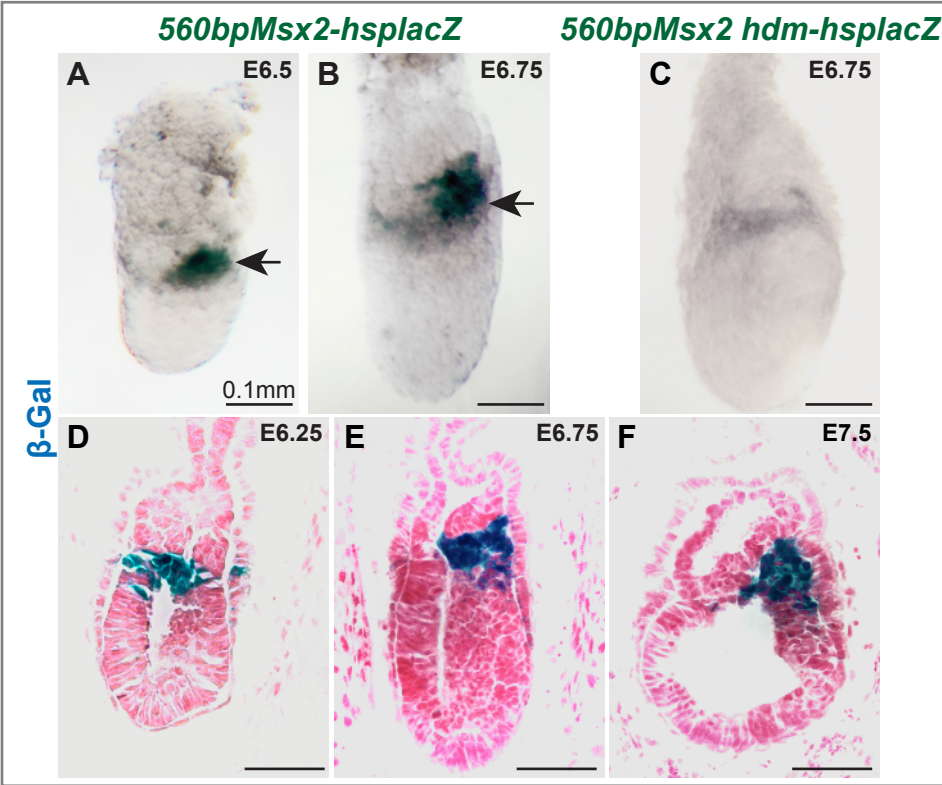

Supplementary Figure2

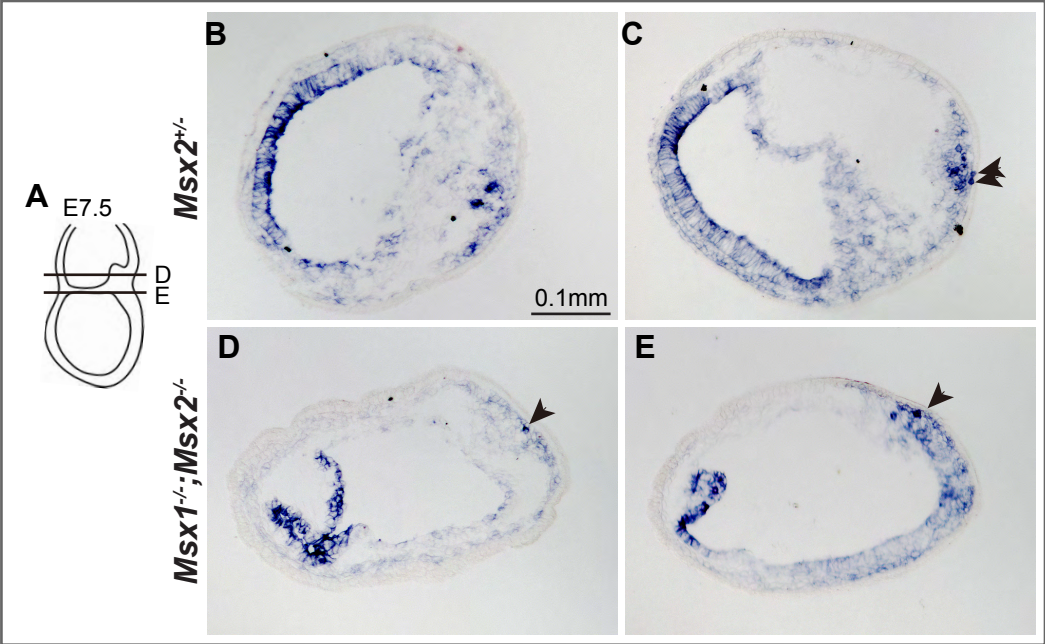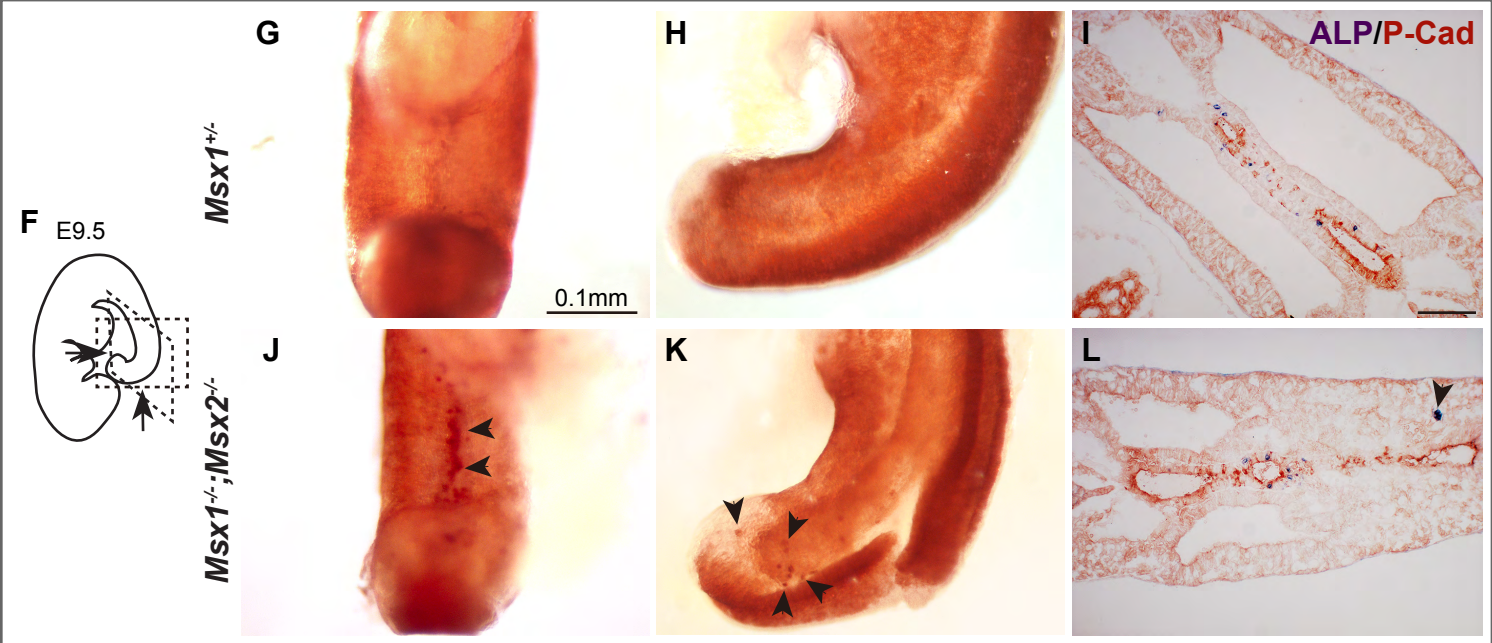

Supplementary Figure3

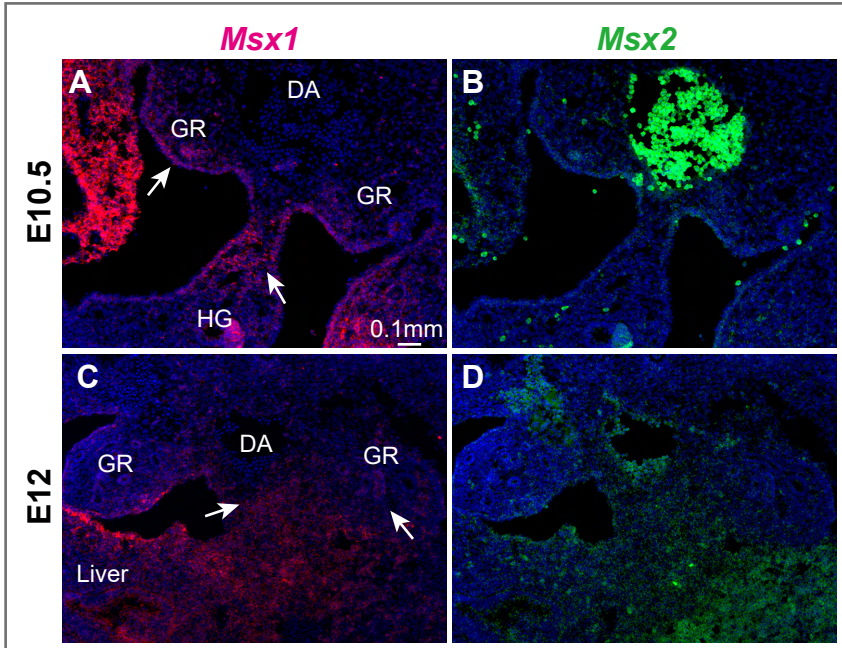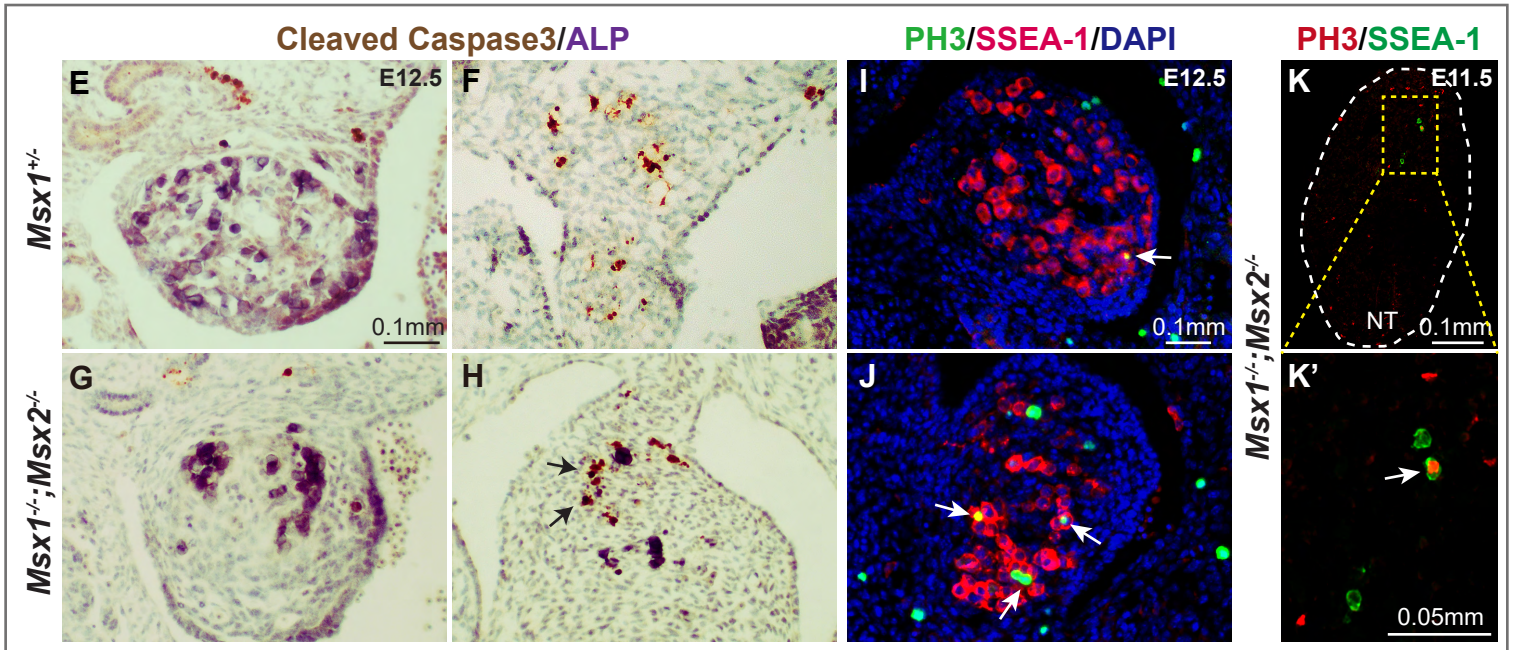

Supplementary Figure4

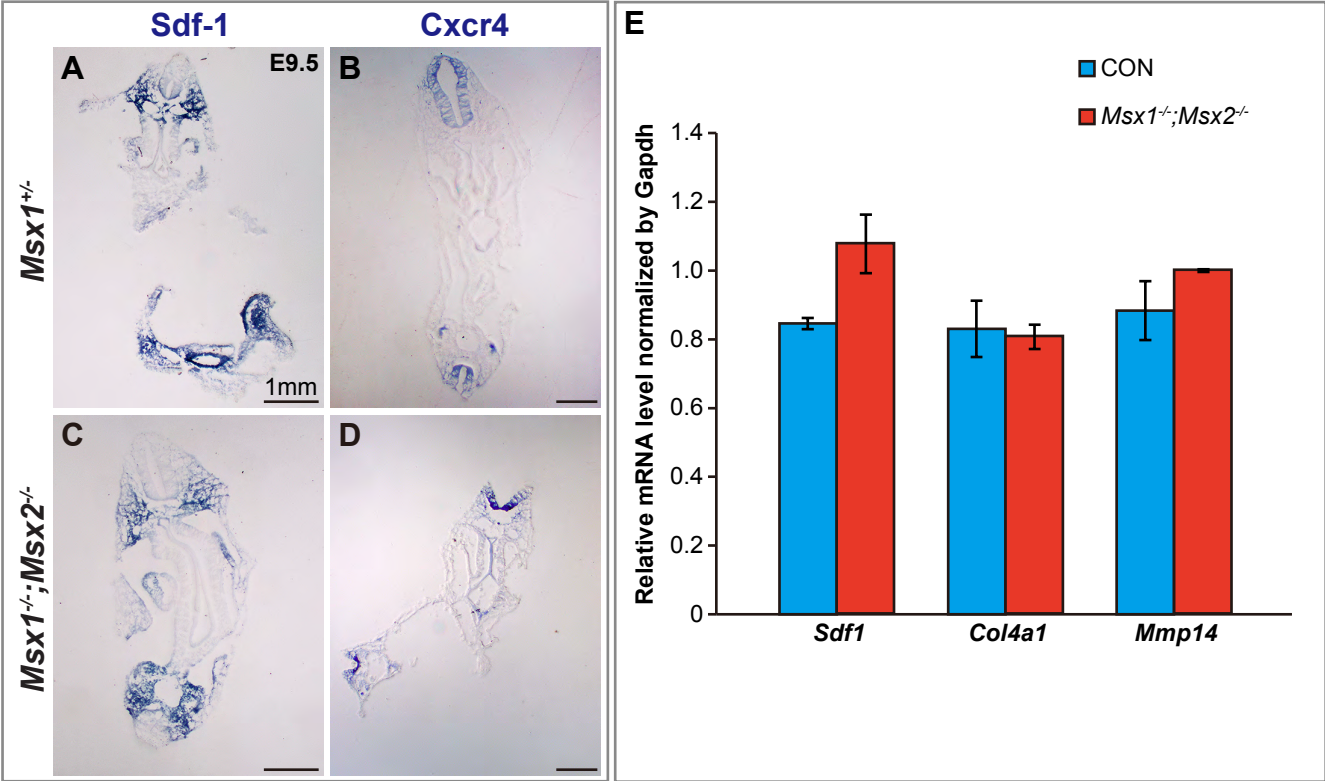

Supplementary Figure 5

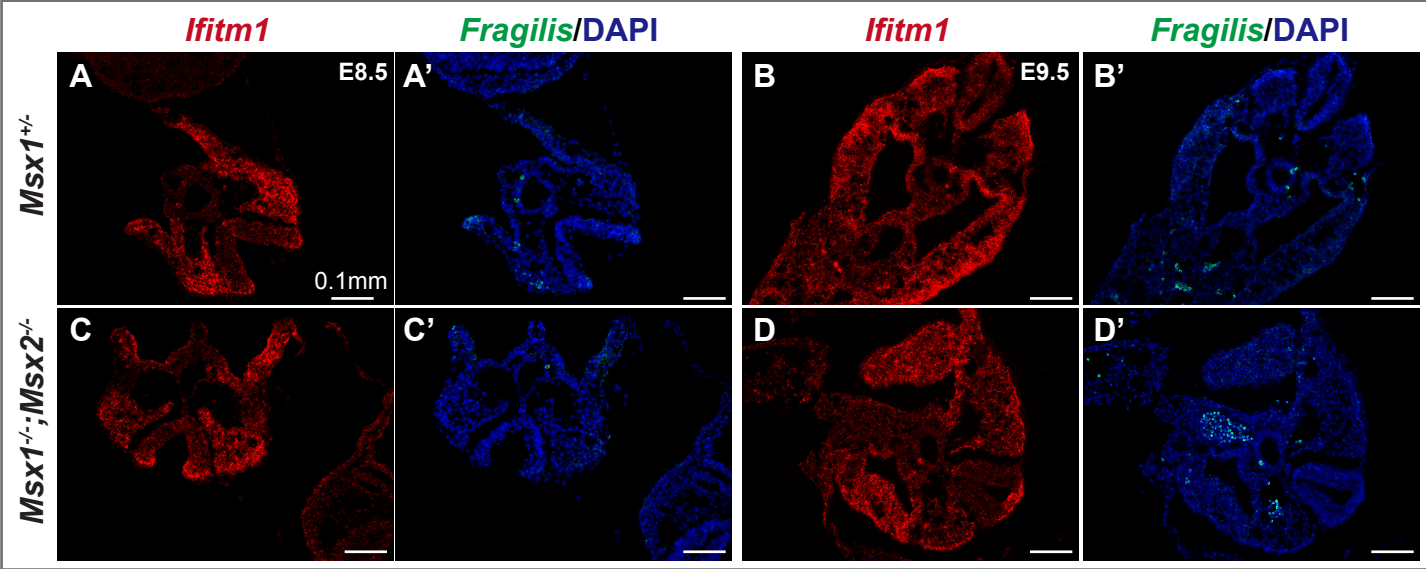

Supplement: NIHMS813879-supplement-2.pdf [file NIHMS813879-supplement-2.pdf]
